# Supplementary material
Source: PubMed Central journal article supplement (PMC7271322)
Supplement: EMBR-21-e49054-s001.pdf [file EMBR-21-e49054-s001.pdf]

**TF is a *bona fide* secretory pathway chaperone and interacts with SecB and the translocase**

Jozefien De Geyter\*, Athina G. Portaliou\*, Bindu Srinivasu, Srinath Krishnamurthy, Anastassios Economou\*\* and Spyridoula Karamanou\*\*

KU Leuven, Department of Microbiology and Immunology, Rega Institute for Medical Research, Laboratory of Molecular Bacteriology, B-3000 Leuven, Belgium.

\* Equal contribution

\*\*For correspondence: [lily.karamanou@kuleuven.be](mailto:lily.karamanou@kuleuven.be); [tassos.economou@kuleuven.be](mailto:tassos.economou@kuleuven.be)

**Keywords:** protein secretion; Sec system; SecA; targeting; chaperone; trigger factor; SecB; Outer Membrane Protein A; translocation-competence; protein complex; preprotein; post-translational network

## Table of contents

### Appendix Figures

- **Appendix Figure S1.** Apparent  $K_d$  of TF dimerization, solubility of proOmpA after pre-incubation times and linear sequence of proOmpA\* (related to Figures 1 and 2)..... p. 3
- **Appendix Figure S2.** Native-MS of TF<sub>2</sub> and TF:proOmpA (Related to Figure 2)..... p. 4
- **Appendix Figure S3.** Quantification of SDS-PAGE gels and native-PAGE analyses of TF and SecB interactions and derived SecB-proOmpA affinity (related to Figures 2 and 4) ..... p. 5
- **Appendix Figure S4.** ITC analysis of the interaction between TF and either SecB, or SecA wt or SecA(noC-tail)(related to Figures 5 and 6)..... p. 7
- **Appendix Figure S5.** Native MS of SecB<sub>4</sub> and SecB:proOmpA (related to Figures 4 and 5) ..... p. 8
- **Appendix Figure S6.** The C-tail of SecA is not required for TF-mediated inhibition of translocation *in vivo* and proOmpA translocation and chaperone interaction is chaotrope-independent (related to Figure 6) ..... p. 9

### Appendix Tables:

- **Appendix Table S1:** Bacterial strains ..... p. 10
- **Appendix Table S2:** Plasmids ..... p. 10
- **Appendix Table S3:** Primers ..... p. 12
- **Appendix Table S4:** Buffers ..... p. 12

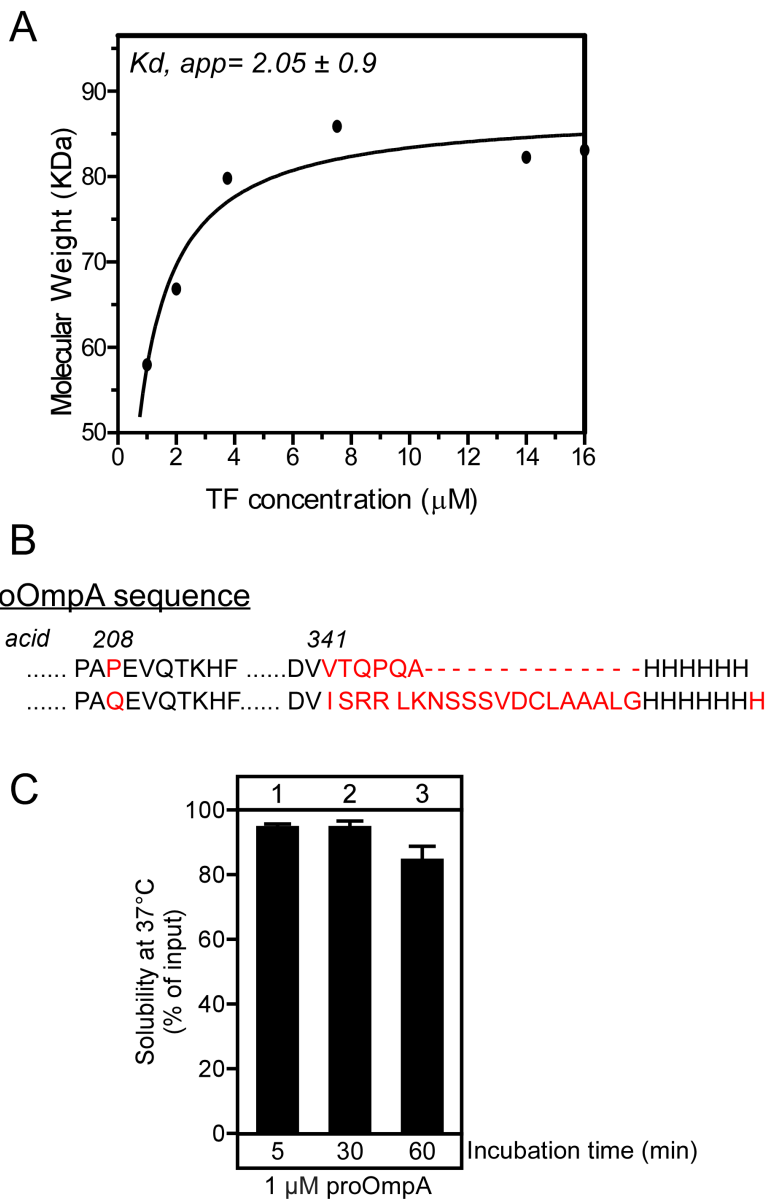

**Appendix Figure S1. Apparent  $K_d$  of TF dimerization, solubility of proOmpA after pre-incubation times and linear sequence of proOmpA\* (related to Figures 1 and 2).**

**A.** Apparent  $K_d$  of TF dimerization in solution. The molecular mass of TF was measured using SEC-MALS at the indicated concentration range. Data were plotted using Graph-Pad Prism and the  $K_d$  was determined using non-linear regression analysis;  $n=1$  biological replicate

**B.** Linear sequence of proOmpA (P0A910) and the proOmpA\* derivative. Mutated amino acids indicated in red, (-) amino acid insertion. All mutations and additions reside in the C-terminal periplasmic peptidoglycan-binding domain of proOmpA.

**C.** proOmpA is retained soluble and does not aggregate at 37°C. proOmpA<sub>1</sub> (1 μM) was incubated (Buffer C; < 0.2 M urea; 37°C) as indicated and soluble proteins (harvested after centrifugation; 20,000 x g; 10 min; 4°C) were estimated using Bradford assay (Biorad). The soluble proOmpA remaining in different time points is expressed as a percentage of the input.  $n= 4$  biological replicates; mean values  $\pm$  SEM are shown.

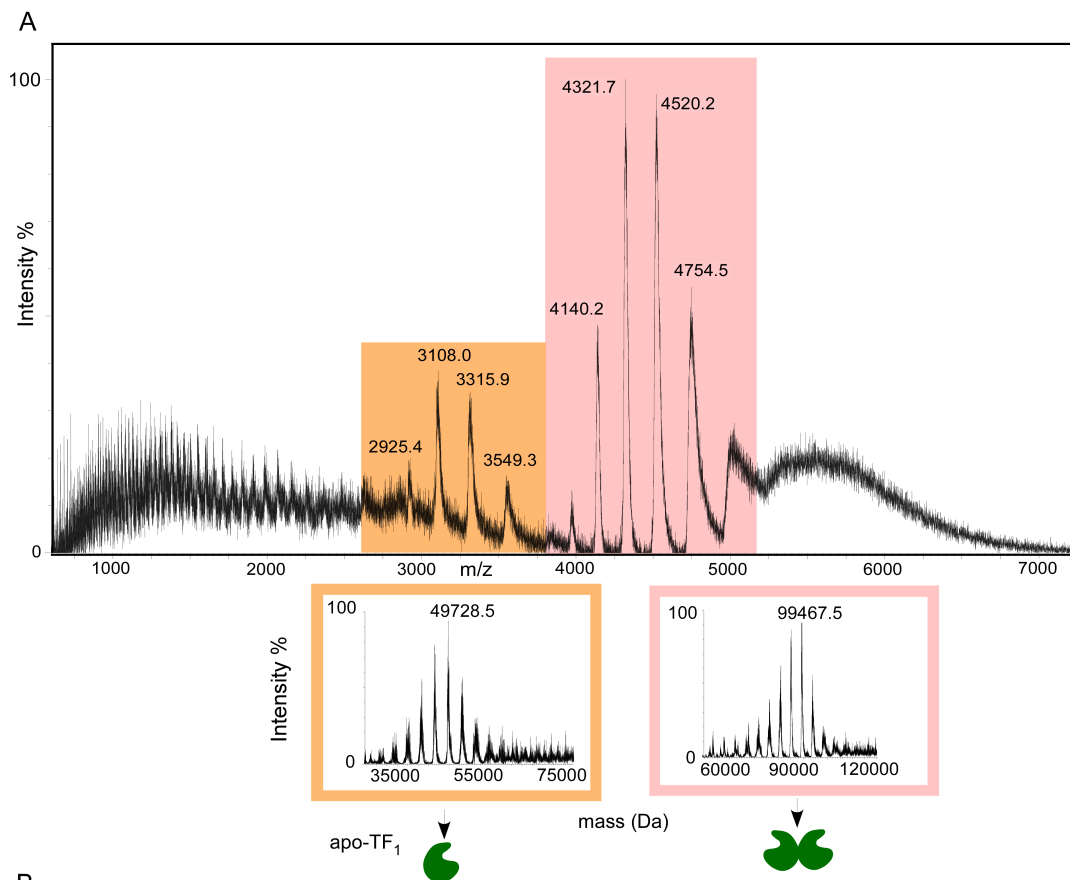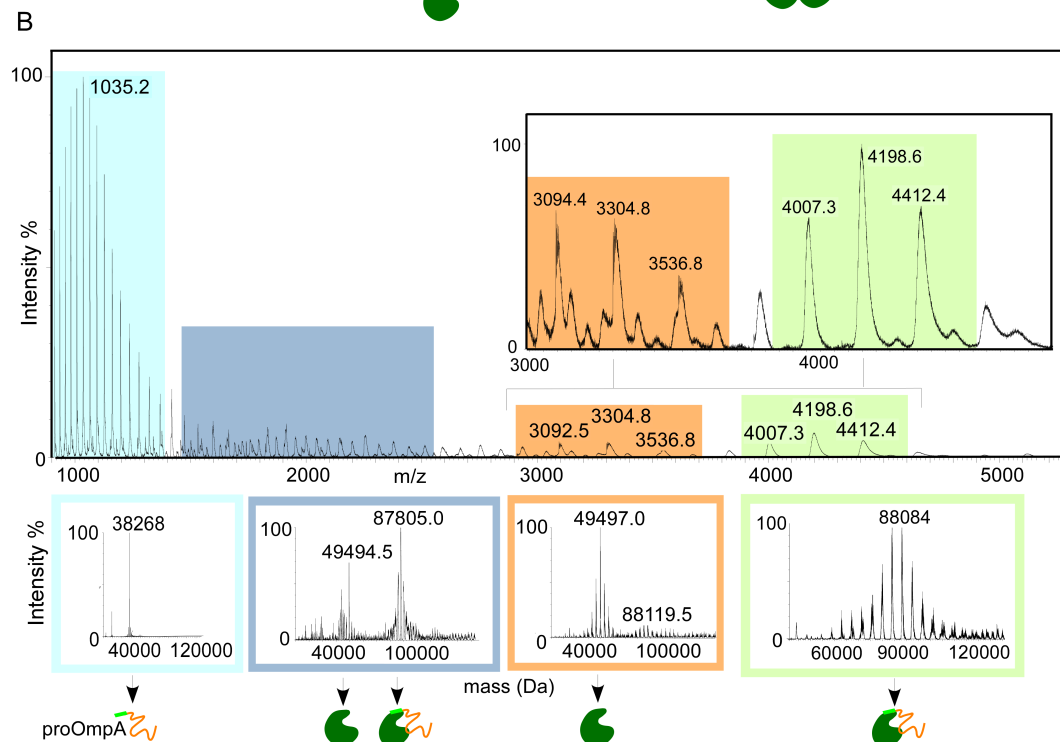

## Appendix Figure S2.

### Native-MS of TF<sub>2</sub> and TF:proOmpA (Related to Fig. 2).

**A.** TF<sub>2</sub> native-MS analysis at 37°C.

ESI-mass spectrum and charge state distributions of monomeric (TF<sub>1</sub>) and dimeric (TF<sub>2</sub>) populations (orange and pink respectively). The

deconvoluted mass spectra of native TF<sub>2</sub> are shown (TF<sub>1</sub>: 49497.0; Da TF<sub>2</sub>:99467.5 Da).

Representative experiment is shown;  $n=3$  biological replicates

**B.** TF:proOmpA native-MS analysis at 37°C.

ESI-mass spectrum and charge state distributions of different protein populations are shown: proOmpA, (TF: proOmpA)<sub>1</sub>, TF<sub>1</sub> and (TF: proOmpA)<sub>2</sub> are colored in cyan, light blue, orange and green respectively. The deconvoluted mass spectra from different

populations of the complexes and the derived stoichiometries are shown (cartoon representation). A representative experiment is shown;  $n=3$  biological replicates

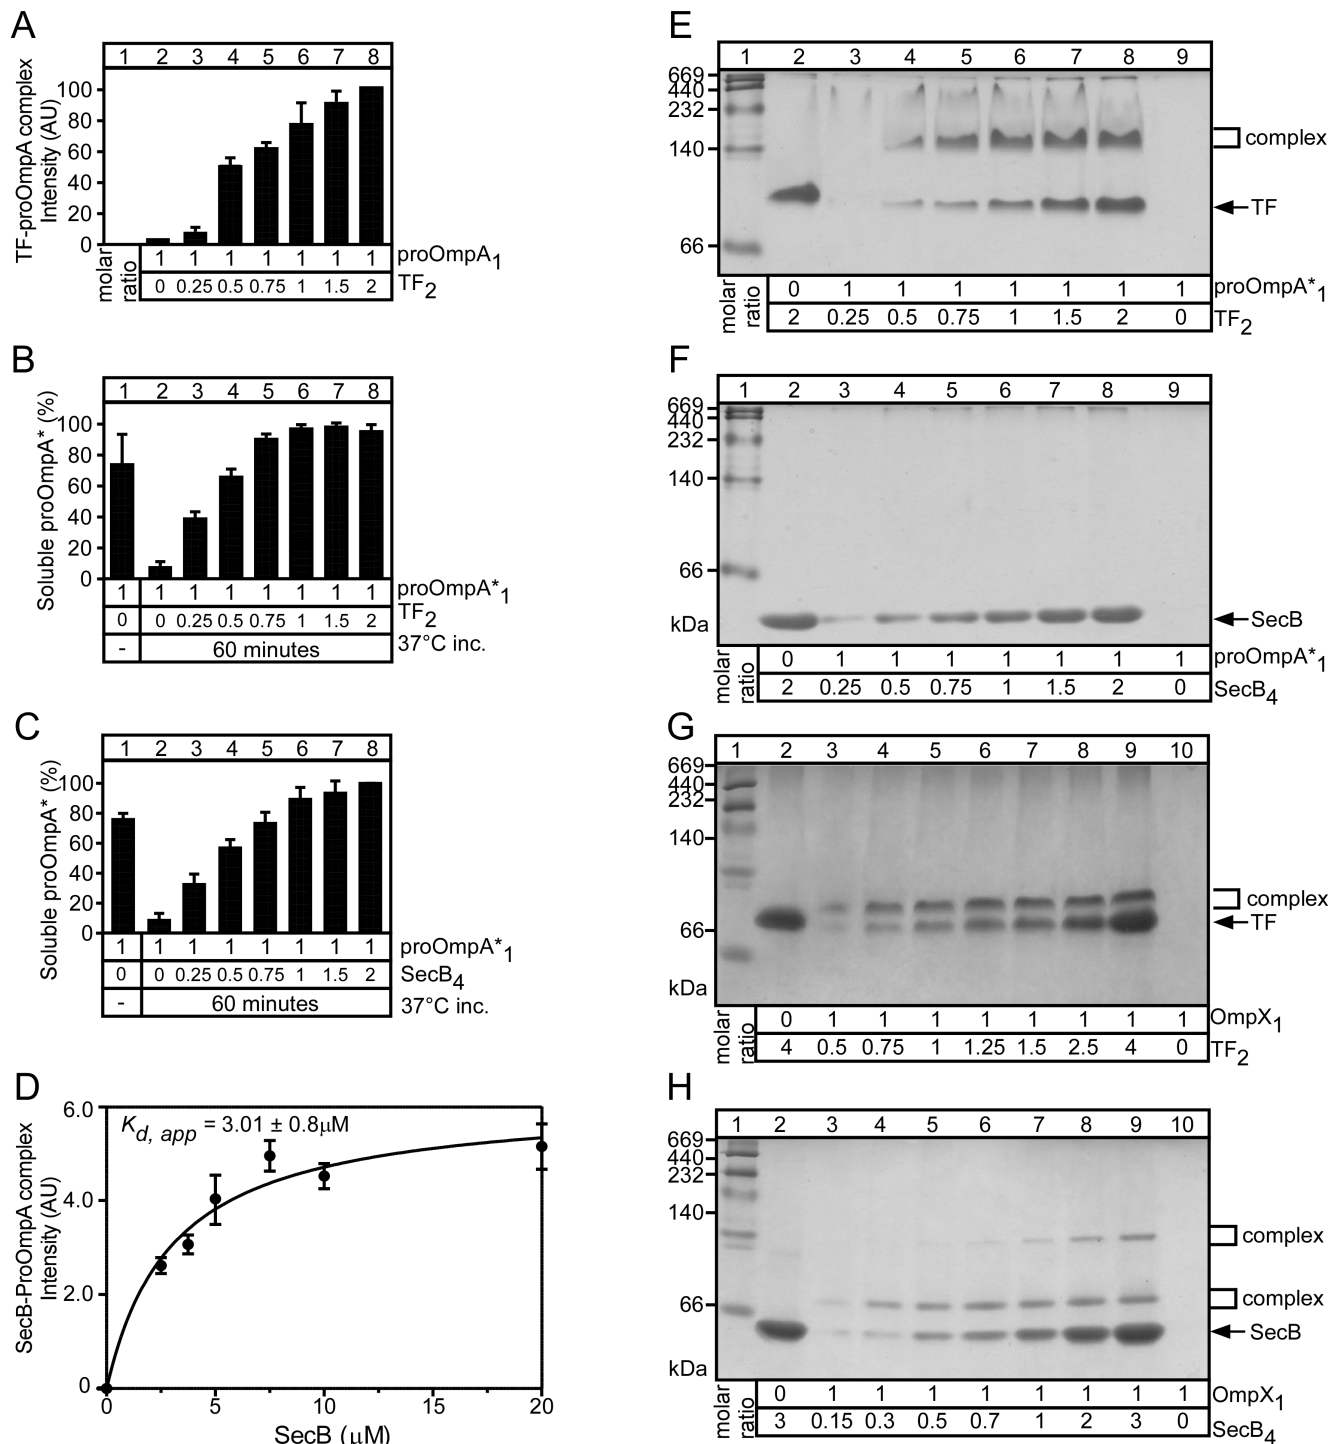

**Appendix Figure S3. Quantification of SDS-PAGE gels and native-PAGE analyses of TF and SecB interactions and derived SecB-proOmpA affinity (related to Figures 2 and 4).**

**A.** Quantification of TF: proOmpA complex formed. Signal intensities from Fig. 2A were quantified using Image J software (<https://imagej.nih.gov/ij/>) and expressed as a percentage of the maximum complex-intensity measured (lane 8); mean values with SEM are shown;  $n=4$  biological replicates

**B.** TF rescues proOmpA\* from aggregation. Signal intensities from Fig. 2C were quantified using Image J software (<https://imagej.nih.gov/ij/>) and expressed as percentage of maximum

proOmpA\*-intensity measured (lane 9); mean values with SEM are shown;  $n=4$  biological replicates

**C.** SecB rescues proOmpA\* from aggregation Signal intensities from Fig. 4B were analyzed as in B; mean values with SEM are shown;  $n=4$  biological replicates

**D.** Apparent  $K_d$  determination of SecB: proOmpA interaction. Signal intensities from Fig. 4C were quantified using Image J software (<https://imagej.nih.gov/ij/>) and data were plotted on Graph Pad Prism 5.0 as a function of the total concentration of SecB used. Apparent  $K_d$  was determined after non-linear regression analysis. Mean values with SEM are shown;  $n=6$  biological replicates

**E.** TF: proOmpA\* complex formation. proOmpA\*<sub>1</sub> (5  $\mu$ M; lane 9) was incubated (50  $\mu$ l; Buffer C; < 0.2 M urea; 37°C; 60 min) with the indicated molar excess of TF<sub>2</sub> (lanes 3-8). Soluble proteins (20,000 x g; 10 min; 4°C) were analyzed on 10% Native-PAGE (4 mA; 16h; 4°C) and Coomassie-blue stained. Lane 2: max TF amount used. Representative experiment is shown;  $n= 4$  biological replicates

**F.** SecB does not form stable complex with proOmpA\*. proOmpA\*<sub>1</sub> was incubated with the indicated molar excess of SecB<sub>4</sub> and soluble proteins analyzed as in E. Lane 2: max SecB amount used. Representative experiment is shown;  $n= 4$  biological replicates

**G.** TF: proOmpX complex formation. proOmpX<sub>1</sub> was incubated with the indicated molar excess of TF<sub>2</sub> and soluble proteins analyzed as in E Lane 2: max TF amount used. Representative experiment is shown;  $n= 4$  biological replicates

**H.** SecB: proOmpX complex formation. proOmpX<sub>1</sub> was incubated with the indicated molar excess of SecB<sub>4</sub> and soluble proteins analyzed as in E Lane 2: max SecB amount used. Representative experiment is shown;  $n= 2$  biological replicates

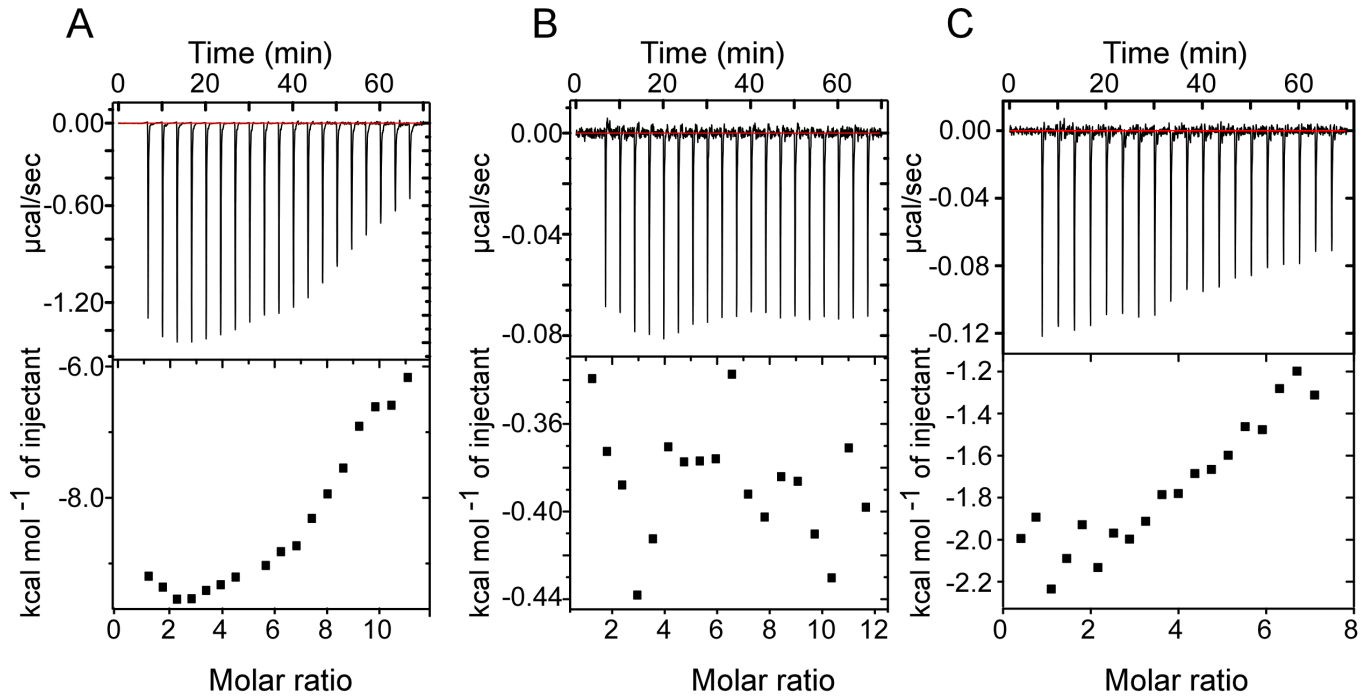

**Appendix Figure S4. TF interaction with either SecB, or SecA wt or SecA(noC-tail) in solution (related to Figures 5 and 6).**

ITC analysis of TF<sub>2</sub> (cell) with SecA<sub>2</sub> (A) SecB<sub>4</sub> (B) and SecA-ΔC-tail (C) in the syringe. Experiments were performed in Buffer H at 25°C using an iTC200 instrument (Malvern). The raw data are shown as an injection profile (top) and the calorimetric binding isotherm (bottom). No measurable  $K_d$  derived from these experiments. A representative experiment is shown;  $n=3$  biological replicates

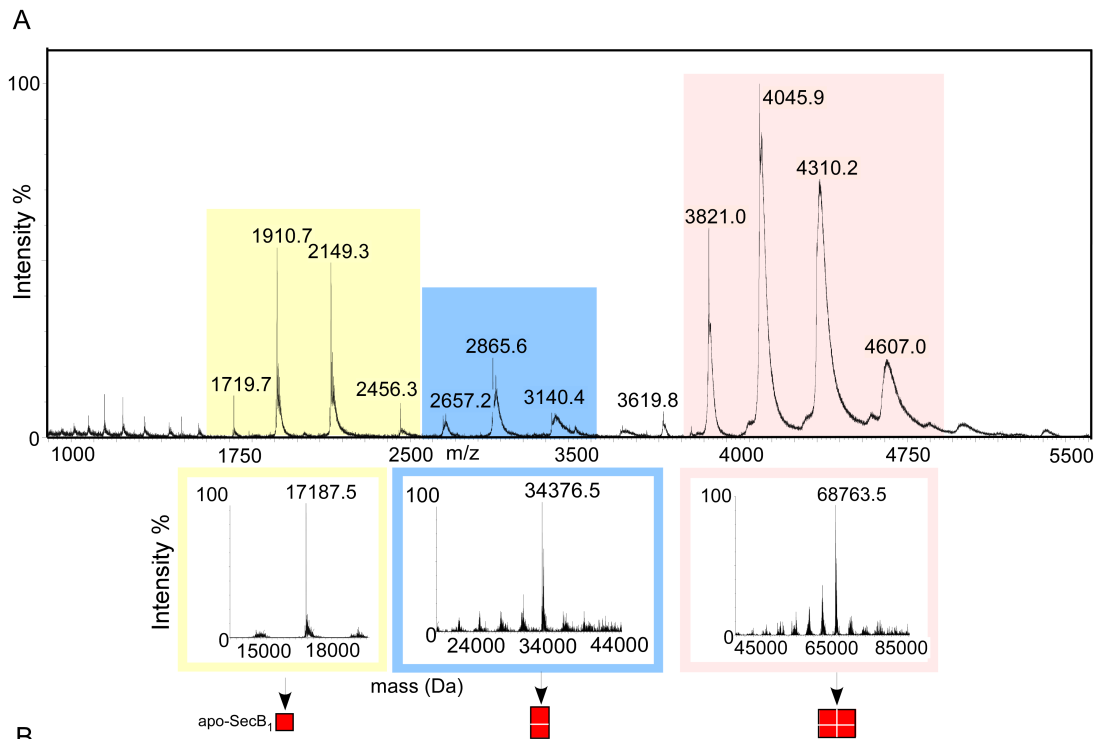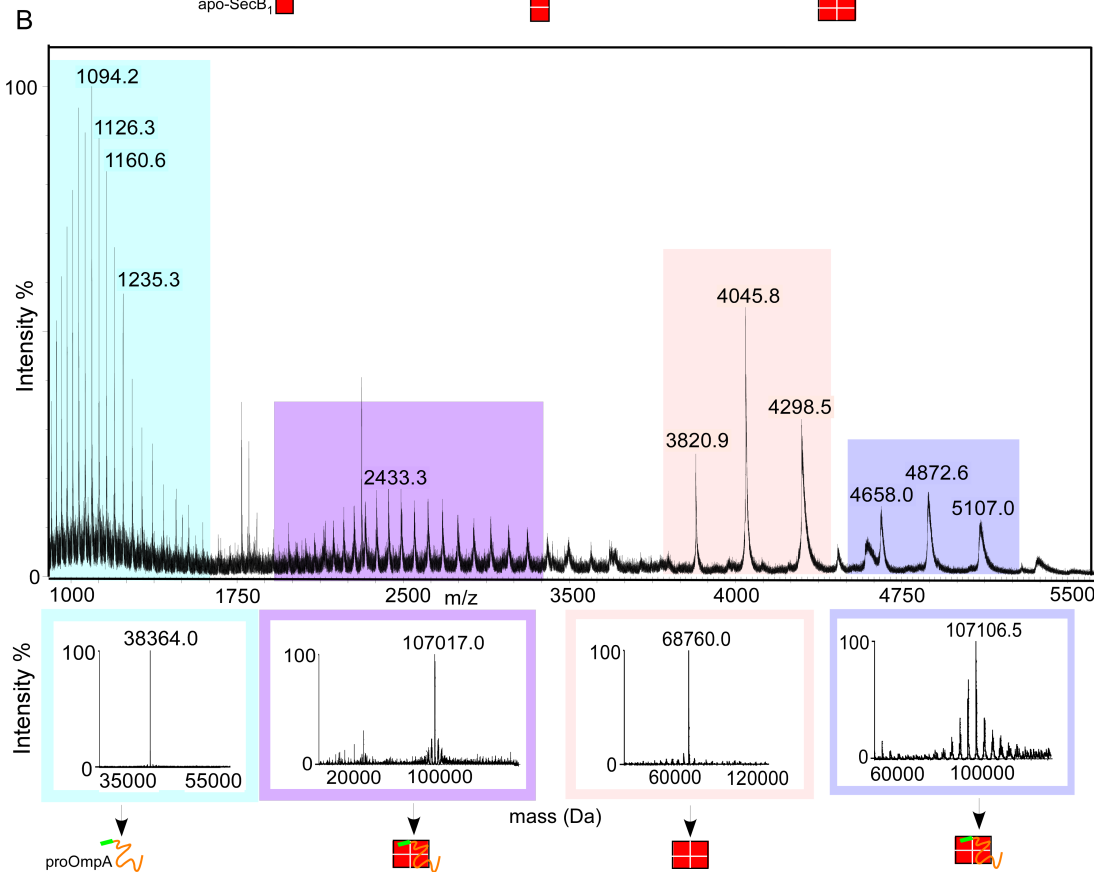

### Appendix Figure S5.

#### Native MS of SecB<sub>4</sub> and SecB:proOmpA (related to Figures 4 and 5).

**A.** SecB<sub>4</sub> native-MS analysis at 37°C. ESI-mass spectrum and charge state distributions of monomer (SecB<sub>1</sub>), dimer (SecB<sub>2</sub>) and tetramer (SecB<sub>4</sub>) populations are colored in yellow, blue and light pink respectively. The deconvoluted mass spectra of native SecB<sub>4</sub> are shown (SecB<sub>1</sub>: 17187.5 Da; SecB<sub>2</sub>: 34376.5 Da; SecB<sub>4</sub>: 68763.5 Da). Representative experiment is shown;  $n=3$  biological replicates

**B.** SecB:proOmpA native-MS analysis at 37°C. ESI-mass spectrum and charge state distributions of different protein populations are shown: proOmpA, (SecB<sub>4</sub>: proOmpA)<sub>1</sub>, SecB<sub>4</sub> and (SecB<sub>4</sub>: proOmpA)<sub>2</sub> are colored in cyan, violet, light pink and light purple respectively. The deconvoluted mass spectra from different populations of the complexes and the derived stoichiometries are shown (cartoon representation). A representative experiment is shown;  $n=3$  biological replicates

light purple respectively. The deconvoluted mass spectra from different populations of the complexes and the derived stoichiometries are shown (cartoon representation). A representative experiment is shown;  $n=3$  biological replicates



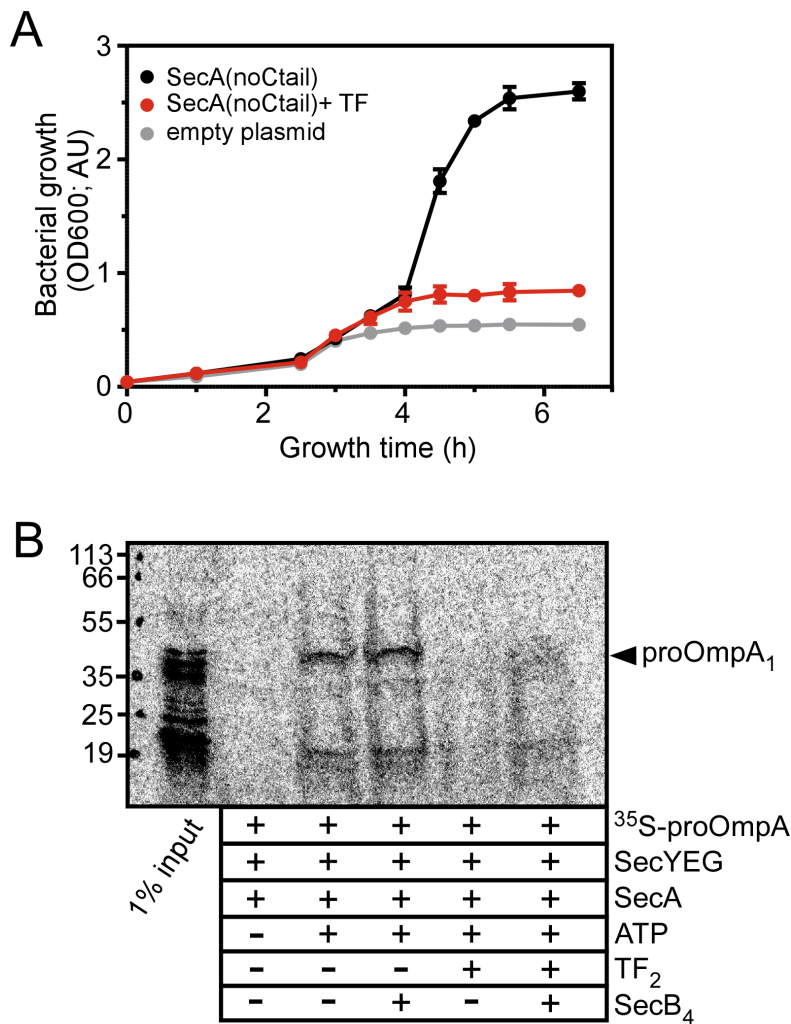

**Appendix Figure S6. The C-tail of SecA is not required for TF-mediated inhibition of translocation *in vivo* and proOmpA translocation and chaperone interaction is chaotrope-independent (related to Figure 6)**

**A.** Growth curves of the *E. coli* BL21-19, a strain thermosensitive for the *secA* gene [1], carrying vector pBAD501 (p15A ori, gentamycin<sup>R</sup>, *ara* promoter)[2] with either the *secA*(no-Ctail) cloned, or empty, and the pASK IBA 7 plus vector (Col E1 ori, ampicillin<sup>R</sup>, *tet* promoter) empty or harbouring the cloned *tig* gene (encoding TF), as indicated. Bacteria were grown in LB at 30°C supplemented with Ampicillin (100µg/ml) and Gentamycin (10µg/ml). When culture OD<sub>600</sub> reached 0.5, gene expression was induced (AHT; 5 ng/ml; L-arabinose; 0.1%w/v), cultures were transferred at 42°C and culture density was determined every 30 minutes post-induction spectrophotometrically. Mean values with SEM are shown; *n* = 3 biological replicates

**B.** *In vitro* translocation of proOmpA and chaperone effects are independent of chaotrope effects. [<sup>35</sup>S]-proOmpA was synthesized *in vitro* using a TnT system in the absence of urea, and after removal of the ribosomes by ultra-centrifugation, was used in an *in vitro* SecA-dependent translocation assay (as in Fig. 5C). A representative autoradiograph is shown; *n*=3 biological replicates

## Appendix Materials

### Appendix Table S1: Bacterial Strains

| <i>E. coli</i> strain            | Description (gene deleted)                                                                                                                                                                                                                             | Reference/source      |
|----------------------------------|--------------------------------------------------------------------------------------------------------------------------------------------------------------------------------------------------------------------------------------------------------|-----------------------|
| MC4100                           | <i>F-araD139 φ(argF-lac)U169 rpsL150 (StrR) relA1 flbB5301 deoC1 pstF25 rbsR</i>                                                                                                                                                                       | P. Genevaux [3-5]     |
| MC4100Δ <i>secB</i>              | In-frame deletion/replacement of the <i>secB</i> gene by the <i>cat</i> gene.                                                                                                                                                                          | P. Genevaux [3,4,6,7] |
| MC4100Δ <i>tig</i> Δ <i>secB</i> | In-frame deletion/replacement of the <i>secB</i> gene by the <i>cat</i> gene.<br>The Δ <i>tig</i> ::Cm <sup>R</sup> allele was moved by bacteriophage P1 transduction into MC4100 and the Cm <sup>R</sup> cassette was removed by the FLP recombinase. | P. Genevaux [3,4,6,7] |
| Lemo21(DE3)                      | T7 RNA polymerase gene under the control of the <i>lacUV5</i> promoter.                                                                                                                                                                                | New England BioLabs   |
| BL21.19(DE3)                     | <i>secA13 (Am) supF (Ts) trp (Am) zch::Tn10 recA::cat clpA::kan</i>                                                                                                                                                                                    | [1]                   |
| Tuner (DE3)                      | <i>lacZY</i> deletion mutant of BL21.                                                                                                                                                                                                                  | Novagen               |
| BL31(DE3)                        | Non <i>ts</i> spontaneous revertant of BL21.19(DE3).                                                                                                                                                                                                   | [2]                   |

### Appendix Table S2: Plasmids

Genes were cloned in the indicated plasmid vectors using combinations of restriction enzymes (as indicated). Mutations were introduced on genes *via* the QuickChange Site-Directed Mutagenesis protocol (Stratagene-Agilent); templates and primers were as indicated. Restriction enzymes and T4 DNA Ligase were either from Minotech (Greece) or Promega or NEB. For PCR mutagenesis PFU Ultra Polymerase (Stratagene) was used; for gene amplification either Expand High fidelity Polymerase (Roche) or PFU Ultra polymerase (Promega) was used. DpnI was used to cleave the maternal methylated DNA (NEB or Promega). All PCR-generated plasmids were sequenced (MacroGen Europe). Plasmids were stored in DH5α cells

| Gene                  | Uniprot accession number | Plasmid name | Vector | Description/source/reference                                                                                                                                                                                           |
|-----------------------|--------------------------|--------------|--------|------------------------------------------------------------------------------------------------------------------------------------------------------------------------------------------------------------------------|
| <b>Preproteins</b>    |                          |              |        |                                                                                                                                                                                                                        |
| <i>proompA*</i>       | P0A910                   | pIMBB454     | pET22b | <i>proompA</i> gene was amplified from pTY009 using the primers X191 and X193 and inserted into the NdeI-EcoRI sites of pET22b. Mutations and additions (Fig. S3A) were introduced during the making of the construct. |
| <i>proompA</i>        | P0A910                   | pLMB1835     | pET22b | <i>proompA</i> gene was amplified from pIMBB1589 (pBAD <i>proompA-phoA</i> -His) using primers X191 (Forw NdeI) and X1269 (Rev XhoI) and inserted into same sites of pET22b [8].                                       |
| <i>prophoA Δcys</i>   | P00634                   | pIMBB977     | pET22b | [9]                                                                                                                                                                                                                    |
| <b>Mature domains</b> |                          |              |        |                                                                                                                                                                                                                        |
| <i>ompA</i>           | P0A910                   | pIMBB1386    | pET22b | <i>OmpA</i> gene was amplified from DH5a strain using primers X558 (Forw NdeI)                                                                                                                                         |

|                                                                         |                            |           |               |                                                                                                                                                                                         |
|-------------------------------------------------------------------------|----------------------------|-----------|---------------|-----------------------------------------------------------------------------------------------------------------------------------------------------------------------------------------|
|                                                                         |                            |           |               | and X1269 (Rev XhoI) and inserted to the same sites of pET22b [8].                                                                                                                      |
| <b>Chaperones</b>                                                       |                            |           |               |                                                                                                                                                                                         |
| <i>secB</i>                                                             | P0AG86                     | pIMBB1602 | pASKIBA7 plus | <i>secB</i> gene amplified from pIMBB490 (pET16b <i>secB</i> ) using primers X1944 (Forw XbaI with RBS) and X1945 (Rev HindIII) and was inserted to the same sites of pASKIBA7plus.     |
| <i>tig</i>                                                              | P0A850                     | pIMBB1605 | pASKIBA7 plus | <i>tig</i> gene (encodes TF) was amplified from pCold-TF (Takara) using primers X1946 (Forw XbaI with RBS) and X1947 (Rev HindIII) and inserted to the same sites of pASKIBA7plus.      |
| <i>tig</i> (3A)<br>(F44A/R45A/K46A)                                     | P0A850                     | pLMB2079  | pASKIBA7 plus | The 3 mutations (F44A/R45A/K46A) were introduced in pIMBB1605 using primer pair X2324-X2325                                                                                             |
| <i>tig</i> (4A)<br>(M374A/Y378A/V384A/F387A)                            | P0A850                     | pIMBB1606 | pASKIBA7 plus | <i>tig</i> 4A gene amplified from pLMB0038 [10] using primers X1946 and X1947 and was inserted to the XbaI-HindIII sites of pASKIBA7plus.                                               |
| <i>tig</i> (4A, 3A)<br>(F44A/R45A/K46A/<br>M374A/Y378A/<br>V384A/F387A) | P0A850                     | pLMB2080  | pASKIBA7 plus | The 3 mutations (F44A/R45A/K46A) were introduced in pIMBB1605 using primer pair X2324-X2325                                                                                             |
| <i>secB</i>                                                             | P0AG86                     | pIMBB351  | pJW25         | [11]                                                                                                                                                                                    |
| <i>tig</i>                                                              | P0A850                     | pCold-TF  | pCold-TF      | Takara.                                                                                                                                                                                 |
| <b>Sec Translocase</b>                                                  |                            |           |               |                                                                                                                                                                                         |
| <i>secYEG</i>                                                           | P0AGA2<br>P0AG96<br>P0AG99 | pIMBB336  | pET610        | A. Driessen, University of Groningen, Groningen, the Netherlands [12]                                                                                                                   |
| <i>secA</i> (1-901)                                                     | P10408                     | pIMBB10   | pET5          | [13]                                                                                                                                                                                    |
| <i>secA</i> (1-834)                                                     | P10408                     | pIMBB1296 | pET5          | SecA(noC-tail)<br>[14]                                                                                                                                                                  |
| <i>secA</i> (1-834)                                                     | P10408                     | pLMB2081  | pBAD501       | <i>secA</i> (noC-tail) gene amplified from pIMBB1296 using primers X157 and X1896 and was inserted to the NdeI-XhoI sites of pBAD501 [2]                                                |
| <i>secA</i> (1-901)_<br>PatchA                                          | P10408                     | pLMB1893  | pET3a         | <u>SecA(noPatchA)</u><br>The <i>secA</i> N1-314 PatchA/C98S DNA fragment was digested out from sgLMB0060 and inserted to pET3a <i>secA</i> 1-901 (pIMBB1280) after NdeI-MluI digestion. |
| His- <i>secA</i><br>(I304A/L306A)                                       | P10408                     | pIMBB691  | pET5          | <u>SecA(noSP)</u><br>[14]                                                                                                                                                               |

**Appendix Table S3: Primers**

| <b>X number</b> | <b>DNA sequence (5'-3'; Mutated codons are bold, restriction sites underlined)</b> | <b>Description</b>                                                                         |
|-----------------|------------------------------------------------------------------------------------|--------------------------------------------------------------------------------------------|
| X157            | GGCCCCGT <u>ACATAT</u> GCTAATCAAATTGTAAAC                                          | Forward <i>secA</i> primer introducing an NdeI site                                        |
| X191            | GGAATTCC <u>ATATG</u> AAAAAGACAGCTATCGC                                            | Forward primer for <i>proompA</i> amplification, introducing an NdeI site.                 |
| X193            | CGGAATTCTTAAGCCTGCGGCTGAGTTAC                                                      | Reverse primer for <i>proompA</i> amplification, introducing an EcoRI site.                |
| X558            | GGGAATTCC <u>ATATG</u> GCTCCGAAAGATAACACCT                                         | Forward primer of <i>ompA</i> amplification. Anneals at Ala 22 introducing an NdeI 5' end. |
| X1269           | GACCCGCTCGAGAGCCTGCGGCTGAGTTACAACG                                                 | Reverse <i>proompA</i> primer introducing an XhoI site.                                    |
| X1896           | CCGGACCTCGAGTTATTGCAGGCGGCCATGGCACTGC                                              | Reverse <i>secA</i> primer introducing an XhoI site                                        |
| X1944           | GCGGTCTAGATTAAGTATAA <b>GAAGGAG</b> ATATACATATGTCAGAACAAAACAACACTG                 | Forward <i>secB</i> primer introducing an rbs region and an XbaI site.                     |
| X1945           | CCCAAGCTTT <b>TTAGGC</b> ATCCTGATGTTCTTCAGTACCTTC                                  | Reverse <i>secB</i> primer introducing a stop codon and a HindIII site.                    |
| X1946           | GCGGTCTAGATTAAGTATAA <b>GAAGGAG</b> ATATACATATGCAAGTTTCAGTTGAAACC                  | Forward <i>tig</i> primer introducing an rbs region and an XbaI site.                      |
| X1947           | CCCAAGCTTT <b>TTACGC</b> CTGCTGGTTCATCAGCTCG                                       | Reverse <i>tig</i> primer introducing a stop codon and a HindIII site.                     |
| X2324           | GCGAAAAAGTACGTATTGACGGC <b>GCG</b><br><b>GCTGCT</b> GGCAAAGTGCCAATGAATATCGTT       | Forward <i>tig</i> primer for generating F44A R45A K46A                                    |
| X2325           | AACGATATTCATTGGCACTTTGCC <b>AGCAGCCGCGC</b><br>CGTCAATACGTACTTTTTTCGC              | Reverse <i>tig</i> primer for generating F44A R45A K46A                                    |

**Appendix Table S4: Buffers**

| <b>Buffer</b> | <b>Composition</b>                                                                                                         |
|---------------|----------------------------------------------------------------------------------------------------------------------------|
| <b>A</b>      | 50 mM Tris-HCl pH 8.0; 50 mM NaCl                                                                                          |
| <b>B</b>      | 6 M urea; 50 mM Tris-HCl pH 8.0; 50 mM NaCl                                                                                |
| <b>C</b>      | 50 mM Tris-HCl pH 8.0; 50 mM NaCl; 1 mM DTT; 1 mM EDTA                                                                     |
| <b>D</b>      | 50 mM Tris-HCl pH 8.0; 50 mM KCl; 5 mM MgCl <sub>2</sub>                                                                   |
| <b>E</b>      | 50 mM Tris-HCl; pH 8.0; 50 mM KCl; 5 mM MgCl <sub>2</sub> ; 5 μM ZnCl <sub>2</sub> ; 1mg/ml BSA; 1 mM DTT; 1 mM ATP        |
| <b>F</b>      | 50 mM Tris-HCl pH 8.0; 50 mM KCl; 1 mM MgCl <sub>2</sub> ; 5 μM ZnCl <sub>2</sub>                                          |
| <b>G</b>      | 50 mM Ammonium Acetate pH 8                                                                                                |
| <b>H</b>      | 50 mM Tris HCl pH 7.5, 50 mM NaCl, and 1 mM TCEP                                                                           |
| <b>I</b>      | 50 mM Tris-HCl pH 8.0; 0.5 M NaCl; 10% Glycerol v/v; 5 mM Imidazole; 2.5 mM PMSF; 50 μg/ml DNase I; 1 mM MgCl <sub>2</sub> |
| <b>J</b>      | 50 mM Tris-HCl pH 8.0; 1 M NaCl; 10% Glycerol v/v; 5 mM Imidazole; 2.5 mM PMSF; 50 μg/ml DNase I; 1 mM MgCl <sub>2</sub>   |
| <b>K</b>      | 20 mM Tris-HCl pH 7.4; 50mM NaCl; 2.5 mM PMSF; 50 μg/ml DNase I; 1 mM MgCl <sub>2</sub>                                    |
| <b>L</b>      | 50 mM Tris-HCl pH 7.6; 200 mM KCl; 2.5 mM PMSF; 50 μg/ml DNase I; 1 mM MgCl <sub>2</sub>                                   |
| <b>M</b>      | 50 mM Tris-HCl pH 8.0; 20% Glycerol v/v; 10 mg/ml DNase I; 50 mg/ml RNase; 1 mM PMSF                                       |
| <b>N</b>      | 50 mM Tris-HCl pH 8.0; 0.5 M NaCl; 10% Glycerol v/v; 8 M urea; 5 mM Imidazole                                              |
| <b>O</b>      | 50 mM Tris-HCl pH 8.0; 0.5 M NaCl; 10% Glycerol v/v; 5 mM Imidazole                                                        |

|           |                                                                                                                 |
|-----------|-----------------------------------------------------------------------------------------------------------------|
| <b>P</b>  | 50 mM Tris-HCl pH 8.0; 0.5 M NaCl; 10% Glycerol v/v; 6 M Urea; 5 mM Imidazole                                   |
| <b>Q</b>  | 50 mM Tris-HCl pH 8.0; 50 mM NaCl; 10% Glycerol v/v; 6 M Urea; 5 mM Imidazole                                   |
| <b>R</b>  | 50 mM Tris-HCl pH 8.0; 50 mM NaCl; 10% Glycerol v/v; 6 M urea; 100 mM Imidazole                                 |
| <b>S</b>  | 50 mM Tris-HCl pH 8.0; 50 mM NaCl; 6 M Urea; 10% Glycerol v/v                                                   |
| <b>T</b>  | 50 mM Tris-HCl pH 8.0; 1 M NaCl; 10% Glycerol v/v; 5 mM Imidazole                                               |
| <b>U</b>  | 50 mM Tris-HCl pH 8.0; 50 mM NaCl; 10% Glycerol v/v; 5 mM Imidazole                                             |
| <b>V</b>  | 50 mM Tris-HCl pH 8.0; 50 mM NaCl; 10% Glycerol v/v; 100 mM Imidazole                                           |
| <b>W</b>  | 50 mM Tris-HCl pH 8.0; 50 mM NaCl; 10% Glycerol v/v                                                             |
| <b>X</b>  | 50 mM Tris-HCl pH 8.0; 50 mM NaCl; 50% Glycerol v/v                                                             |
| <b>Y</b>  | 20 mM Tris-HCl pH 7.4; 50 mM NaCl                                                                               |
| <b>Z</b>  | 20 mM Tris-HCl pH 7.4; 100 mM NaCl                                                                              |
| <b>AA</b> | 20 mM Tris-HCl pH 7.4; 200 mM NaCl                                                                              |
| <b>AB</b> | 20 mM Tris-HCl pH 7.4; 350 mM NaCl                                                                              |
| <b>AC</b> | 50 mM Tris-HCl pH 8.0; 1 M NaCl                                                                                 |
| <b>AD</b> | 50 mM Tris-HCl pH 7.6; 200 mM KCl                                                                               |
| <b>AE</b> | 50 mM Tris-HCl pH 7.6; 1.2 M KCl                                                                                |
| <b>AF</b> | 50 mM Tris-HCl pH 8.0                                                                                           |
| <b>AG</b> | 50 mM Tris-HCl pH 8.0; 20% Glycerol v/v                                                                         |
| <b>AH</b> | 6 M Urea; 50 mM Tris-HCl pH 8.0                                                                                 |
| <b>AI</b> | 50 mM Tris-HCl pH 8.0; 0.2 M Sucrose                                                                            |
| <b>AJ</b> | 50 mM Tris-HCl pH 8.0; 50 mM NaCl; 1 mM DTT; 1 mM EDTA; 6 M Urea                                                |
| <b>AK</b> | 0.2 M Sucrose; 1 mg/ml BSA in 50 mM Tris-HCl pH 8.0; 50 mM KCl; 1 mM MgCl <sub>2</sub> ; 5 μM ZnCl <sub>2</sub> |
| <b>AL</b> | 6 M Urea; 25 mM Tris pH 8.0; 25 mM KCl                                                                          |
| <b>AM</b> | 25 mM Tris pH 8.0; 25 mM KCl                                                                                    |
| <b>AN</b> | 6 M Urea-d <sub>4</sub> (98% atom D); 5 mM DTT; 95.5% (v/v) D <sub>2</sub> O                                    |
| <b>AO</b> | 50 mM Tris-DCl corrected pD 8.0; 50 mM KCl; 1 mM MgCl <sub>2</sub> ; 4 μM ZnSO <sub>4</sub> ; 2 mM TCEP         |

## References

1. Mitchell C, Oliver D (1993) Two distinct ATP-binding domains are needed to promote protein export by *Escherichia coli* SecA ATPase. *Mol Microbiol* **10**: 483-497
2. Chatzi KE, Sardis MF, Tsigiotaki A, Koukaki M, Sostaric N, Konijnenberg A, Sobott F, Kalodimos CG, Karamanou S, Economou A (2017) Preprotein mature domains contain translocase targeting signals that are essential for secretion. *The Journal of cell biology* **216**: 1357-1369
3. Casadaban MJ (1976) Transposition and fusion of the lac genes to selected promoters in *Escherichia coli* using bacteriophage lambda and Mu. *Journal of molecular biology* **104**: 541-555
4. Ullers RS, Ang D, Schwager F, Georgopoulos C, Genevaux P (2007) Trigger Factor can antagonize both SecB and DnaK/DnaJ chaperone functions in *Escherichia coli*. *Proc Natl Acad Sci U S A* **104**: 3101-3106
5. Genevaux P, Schwager F, Georgopoulos C, Kelley WL (2002) Scanning mutagenesis identifies amino acid residues essential for the in vivo activity of the *Escherichia coli* DnaJ (Hsp40) J-domain. *Genetics* **162**: 1045-1053
6. Yu D, Ellis HM, Lee EC, Jenkins NA, Copeland NG, Court DL (2000) An efficient recombination system for chromosome engineering in *Escherichia coli*. *Proc Natl Acad Sci U S A* **97**: 5978-5983
7. Datsenko KA, Wanner BL (2000) One-step inactivation of chromosomal genes in *Escherichia coli* K-12 using PCR products. *Proc Natl Acad Sci U S A* **97**: 6640-6645
8. Tsigiotaki A, Chatzi KE, Koukaki M, De Geyter J, Portaliou AG, Orfanoudaki G, Sardis MF, Trelle MB, Jorgensen TJD, Karamanou S, et al. (2018) Long-Lived Folding Intermediates Predominate the Targeting-Competent Secretome. *Structure* **26**: 695-707 e695
9. Gouridis G, Karamanou S, Sardis MF, Scharer MA, Capitani G, Economou A (2013) Quaternary dynamics of the SecA motor drive translocase catalysis. *Mol. Cell* **52**: 655-666
10. Saio T, Kawagoe S, Ishimori K, Kalodimos CG (2018) Oligomerization of a molecular chaperone modulates its activity. *Elife* **7**:
11. Weiss JB, Ray PH, Bassford PJ, Jr. (1988) Purified secB protein of *Escherichia coli* retards folding and promotes membrane translocation of the maltose-binding protein in vitro. *Proc Natl Acad Sci U S A* **85**: 8978-8982
12. van der Does C, den Blaauwen T, de Wit JG, Manting EH, Groot NA, Fekkes P, Driessen AJ (1996) SecA is an intrinsic subunit of the *Escherichia coli* preprotein translocase and exposes its carboxyl terminus to the periplasm. *Mol Microbiol* **22**: 619-629
13. Karamanou S, Vrontou E, Sianidis G, Baud C, Roos T, Kuhn A, Politou AS, Economou A (1999) A molecular switch in SecA protein couples ATP hydrolysis to protein translocation. *Mol Microbiol* **34**: 1133-1145
14. Gelis I, Bonvin AM, Keramisanou D, Koukaki M, Gouridis G, Karamanou S, Economou A, Kalodimos CG (2007) Structural basis for signal-sequence recognition by the translocase motor SecA as determined by NMR. *Cell* **131**: 756-769
